# Supplementary material for: Polysphaeroides filiformis, a proterozoic cyanobacterial microfossil and implications for cyanobacteria evolution
Source: PubMed Central journal article supplement — iScience. 2024 Jan 11;27(2):108865. doi: 10.1016/j.isci.2024.108865 (PMC10837632; doi:10.1016/j.isci.2024.108865), 2024-01-11
Supplement: mmc1.pdf [file mmc1.pdf]

**Supplemental information**

***Polysphaeroides filiformis*, a proterozoic  
cyanobacterial microfossil and implications  
for cyanobacteria evolution**

**Catherine F. Demoulin, Marie Catherine Sforza, Yannick J. Lara, Yohan Cornet, Andrea Somogyi, Kadda Medjoubi, Daniel Grolimund, Dario Ferreira Sanchez, Remi Tucoulou Tachoueres, Ahmed Addad, Alexandre Fadel, Philippe Compère, and Emmanuelle J. Javaux**

**Table S1. Fossil occurrence of *P. filiformis* during the Precambrian, related to introduction.**

| Country                      | Group      | Formation     | Ages (Ga)     | Environments                                                    | References |
|------------------------------|------------|---------------|---------------|-----------------------------------------------------------------|------------|
| Siberia                      | Bilyakh    | Ust'-Il'ya    | 1.483 ± 0.1   | Deepest water of terrigenous shelf deposits influenced by storm | [1]        |
| Siberia                      | Bilyakh    | Kotuikan      | 1.457 ± 0.220 | Open-sea on carbonate platform                                  | [1, 2]     |
| Democratic Republic of Congo | Mbuji-Mayi | Bllc6         | 1.04-1.006    | Photic shallow-water                                            | [3]        |
| Siberia                      | Miroedikha | Miroedikha    | 0.95-0.85     | Transgressive complex: shallow-water to deepwater               | [4]        |
| North China                  | Tumen      | Shiwangzhuang | 0.85 ± 0.25   | Tidal flat environment                                          | [5]        |
| East European Platform       | /          | Vycheгда      | 0.635-0.55    | Shallow water                                                   | [6]        |

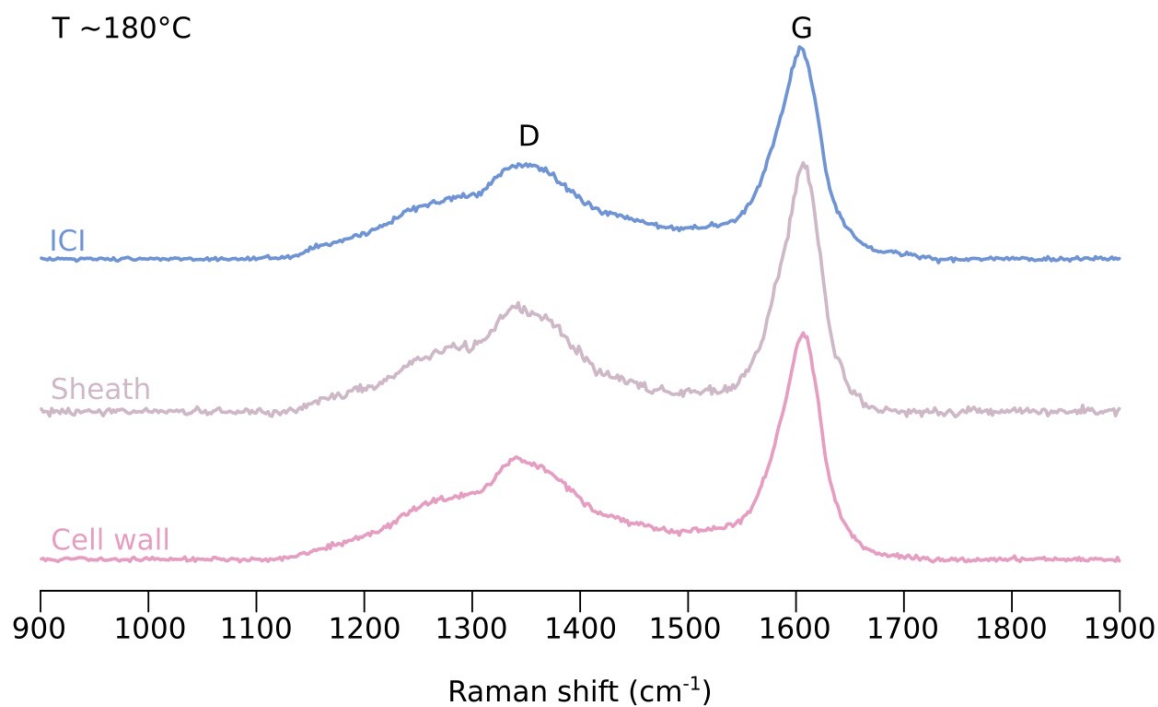

**Figure S2. Representative Raman spectra for the sheath, cell walls and ICIs of *P. filiformis*, related to the STAR methods and Table S3.** The D (disordered carbon band) and G (graphite band) bands are at the same position for all spectra, demonstrating the syngenicity of these structures. Moreover, the metamorphism temperature ( $\sim 180$  °C) was calculated using the Raman Reflectance technique [7]. A total of 10 points were measured on several ICI, cell walls and on the sheath on one filament of *P. filiformis* and gave a mean temperature of  $182.96 \pm 2.33$ °C (sheath),  $180.86 \pm 2.88$ °C (cell wall),  $179.02 \pm 2.05$ °C (ICI).

**Table S3. Raman data obtained for sheath, cell wall and ICI of *P. filiformis*, related to STAR methods and Figure S2.** Raman positions ( $\omega$  in  $\text{cm}^{-1}$ ) and full width at half maximum height (FWHM in  $\text{cm}^{-1}$ ) of bands D1 (disordered carbon band) and G (graphite band) (in  $\text{cm}^{-1}$ ).

Raman reflectance:  $\text{RmcR0} = 0.0537 * (\omega\text{G} - \omega\text{D1}) - 11.21$ .

Calculated temperatures ( $T^{\circ}\text{C RmcR0} = (\text{LN}(\text{RmcRo} + 1.68) / 0.0124)$ ) [7] on sheath, cell walls and ICIs.

| Sheath                     | FWHM D1      | FWHM G       | $\omega$ D1 | $\omega$ G  | RmcR0       | $T^{\circ}\text{C RmcR0}$ |
|----------------------------|--------------|--------------|-------------|-------------|-------------|---------------------------|
|                            | 94,94        | 48,64        | 1359        | 1602        | 1,83        | 184,42                    |
|                            | 94,25        | 48,64        | 1359        | 1602        | 1,84        | 184,44                    |
|                            | 95,12        | 48,22        | 1359        | 1602        | 1,83        | 184,17                    |
|                            | 91,23        | 49,01        | 1360        | 1601        | 1,77        | 181,38                    |
|                            | 92,90        | 48,68        | 1359        | 1601        | 1,77        | 181,42                    |
|                            | 92,30        | 48,51        | 1360        | 1601        | 1,72        | 179,22                    |
|                            | 94,17        | 47,77        | 1359        | 1602        | 1,83        | 184,07                    |
|                            | 90,95        | 48,40        | 1360        | 1601        | 1,74        | 180,35                    |
|                            | 95,09        | 48,93        | 1360        | 1602        | 1,81        | 183,26                    |
|                            | 95,77        | 48,19        | 1359        | 1603        | 1,89        | 186,95                    |
| <b>Mean</b>                | <b>93,67</b> | <b>48,50</b> | <b>1359</b> | <b>1602</b> | <b>1,80</b> | <b>182,97</b>             |
| <b><math>\sigma</math></b> | <b>1,72</b>  | <b>0,37</b>  | <b>0,50</b> | <b>0,74</b> | <b>0,05</b> | <b>2,33</b>               |
| Cellwall                   | FWHM D1      | FWHM G       | $\omega$ D1 | $\omega$ G  | RmcR0       | $T^{\circ}\text{C RmcR0}$ |
|                            | 90,05        | 47,75        | 1359        | 1600        | 1,73        | 179,83                    |
|                            | 85,52        | 48,57        | 1360        | 1602        | 1,79        | 182,31                    |
|                            | 85,42        | 47,09        | 1359        | 1599        | 1,69        | 177,61                    |
|                            | 85,73        | 48,23        | 1359        | 1600        | 1,75        | 180,61                    |
|                            | 82,65        | 47,03        | 1360        | 1600        | 1,70        | 178,13                    |
|                            | 87,64        | 48,09        | 1359        | 1602        | 1,82        | 183,99                    |
|                            | 83,92        | 47,91        | 1360        | 1600        | 1,68        | 177,28                    |
|                            | 86,43        | 46,36        | 1358        | 1599        | 1,73        | 179,76                    |
|                            | 85,34        | 47,55        | 1358        | 1601        | 1,81        | 183,46                    |
|                            | 87,50        | 49,39        | 1359        | 1602        | 1,86        | 185,64                    |
| <b>Mean</b>                | <b>86,02</b> | <b>47,80</b> | <b>1359</b> | <b>1600</b> | <b>1,76</b> | <b>180,86</b>             |
| <b><math>\sigma</math></b> | <b>2,06</b>  | <b>0,86</b>  | <b>0,61</b> | <b>1,13</b> | <b>0,06</b> | <b>2,88</b>               |
| ICI                        | FWHM D1      | FWHM G       | $\omega$ D1 | $\omega$ G  | RmcR0       | $T^{\circ}\text{C RmcR0}$ |
|                            | 83,30        | 47,93        | 1360        | 1600        | 1,68        | 177,51                    |
|                            | 84,88        | 48,15        | 1360        | 1601        | 1,74        | 180,21                    |
|                            | 87,06        | 48,09        | 1360        | 1601        | 1,73        | 179,69                    |
|                            | 84,50        | 46,91        | 1359        | 1598        | 1,62        | 174,62                    |
|                            | 83,65        | 48,62        | 1360        | 1602        | 1,76        | 181,15                    |
|                            | 84,24        | 47,59        | 1359        | 1600        | 1,74        | 180,07                    |
|                            | 83,35        | 48,23        | 1360        | 1602        | 1,76        | 181,14                    |
|                            | 84,23        | 48,38        | 1360        | 1600        | 1,68        | 177,21                    |
|                            | 85,07        | 47,65        | 1360        | 1600        | 1,71        | 178,67                    |
|                            | 84,42        | 47,24        | 1359        | 1600        | 1,74        | 179,95                    |
| <b>Mean</b>                | <b>84,47</b> | <b>47,88</b> | <b>1360</b> | <b>1600</b> | <b>1,72</b> | <b>179,02</b>             |
| <b><math>\sigma</math></b> | <b>1,09</b>  | <b>0,53</b>  | <b>0,55</b> | <b>1,04</b> | <b>0,04</b> | <b>2,05</b>               |



**Table S4.** Numerical values for dimensions of sheath, trichome and cells of the microfossil *Polysphaeroides filiformis* and the four modern strains selected for the comparison, *Stigonema robustum*, *Stigonema turfaceum*, *Stigonema informe* and *Bangiopsis franklynottii*, related to Figure 1 and STAR methods.

| Species                                    |      | Sheath width<br>( $\mu\text{m}$ ) | Trichome width<br>( $\mu\text{m}$ ) | Cells diameter<br>( $\mu\text{m}$ ) |
|--------------------------------------------|------|-----------------------------------|-------------------------------------|-------------------------------------|
| <i>P. filiformis</i><br>(n=30)             | Max  | 75.7                              | 51.1                                | 28.8                                |
|                                            | Min  | 38.6                              | 14.2                                | 5.5                                 |
|                                            | Mean | 56.2                              | 30.9                                | 11.2                                |
|                                            | SD   | 9.1                               | 7.2                                 | 3.5                                 |
| <i>S. robustum</i> CBFS-A027<br>(n=12)     | Max  | 108.8                             | 46.1                                | 25.8                                |
|                                            | Min  | 32.8                              | 31.9                                | 8.6                                 |
|                                            | Mean | 54.3                              | 41.3                                | 14.8                                |
|                                            | SD   | 22.6                              | 6.5                                 | 4.1                                 |
| <i>S. turfaceum</i> CBFS-A034<br>(n=19)    | Max  | 46.4                              | 22.8                                | 18.9                                |
|                                            | Min  | 21.5                              | 12.3                                | 8.1                                 |
|                                            | Mean | 31                                | 17.3                                | 11.9                                |
|                                            | SD   | 6.3                               | 3.4                                 | 4.2                                 |
| <i>S. informe</i> CBFS-A033<br>(n=12)      | Max  | 62.9                              | 52.1                                | 14.6                                |
|                                            | Min  | 25.5                              | 14.9                                | 5.5                                 |
|                                            | Mean | 44.9                              | 33.7                                | 9.2                                 |
|                                            | SD   | 10.6                              | 11.2                                | 2.5                                 |
| <i>B. franklynottii</i> CCMP3416<br>(n=22) | Max  | 44.7                              | 35.5                                | 12.1 x 14                           |
|                                            | Min  | 10                                | 9.5                                 | 4.7 x 6.2                           |
|                                            | Mean | 24.7                              | 18.9                                | 8.5 x 10                            |
|                                            | SD   | 8.6                               | 6.7                                 | 1.8 x 2.1                           |

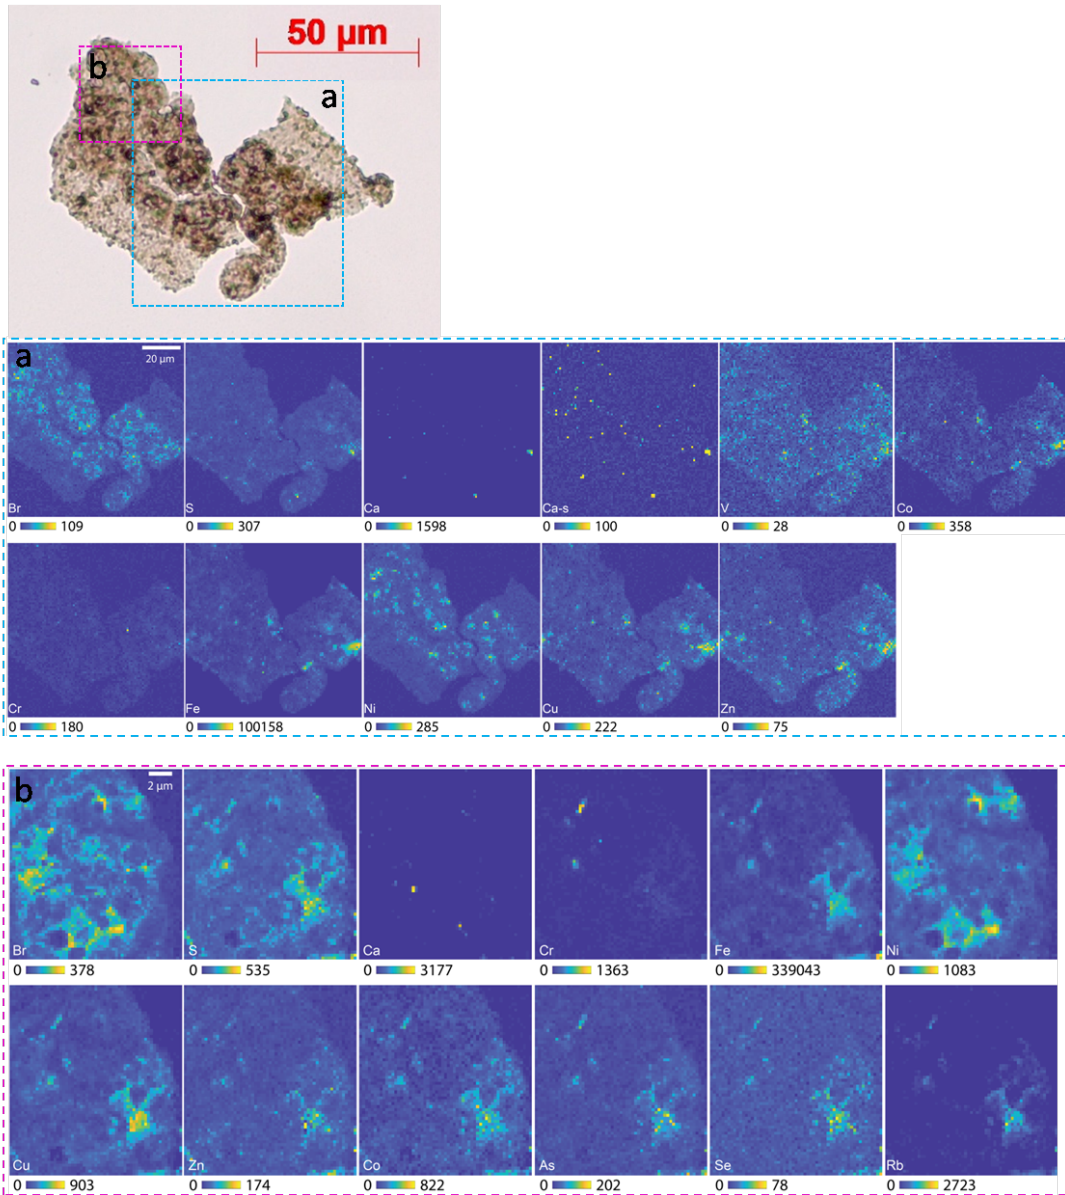

**Figure S5. Photomicrograph of *P. filiformis* and its SR-nanoXRF maps, related to Figure 2.** These SR-nanoXRF maps show the distribution of several elements in two locations (a) blue area and (b) pink area on the microfossil. The map of Ni show that the distribution of this element is mainly within ICIs. These maps were obtained at ESRF synchrotron (energy 17.5 keV).

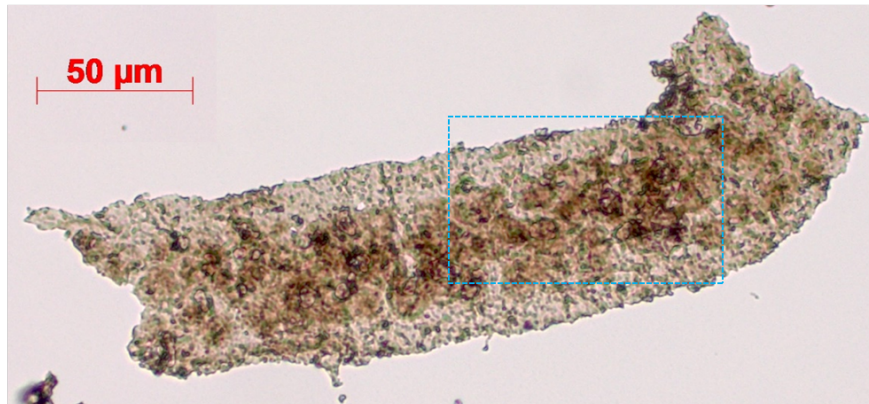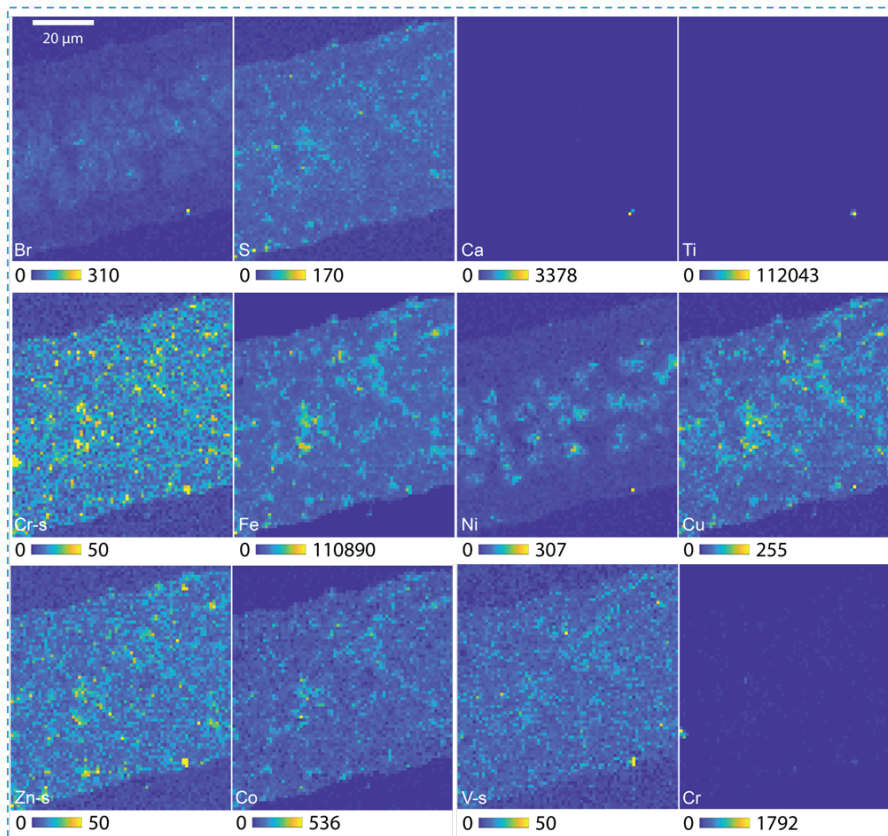

**Figure S6. Photomicrograph of *P. filiformis* and its SR-nanoXRF maps, related to Figure 2.** These SR-nanoXRF maps show the distribution of several elements and highlight that the distribution of Ni is mainly within ICIs (blue area). These maps were obtained at ESRF synchrotron (energy 17.5 keV).

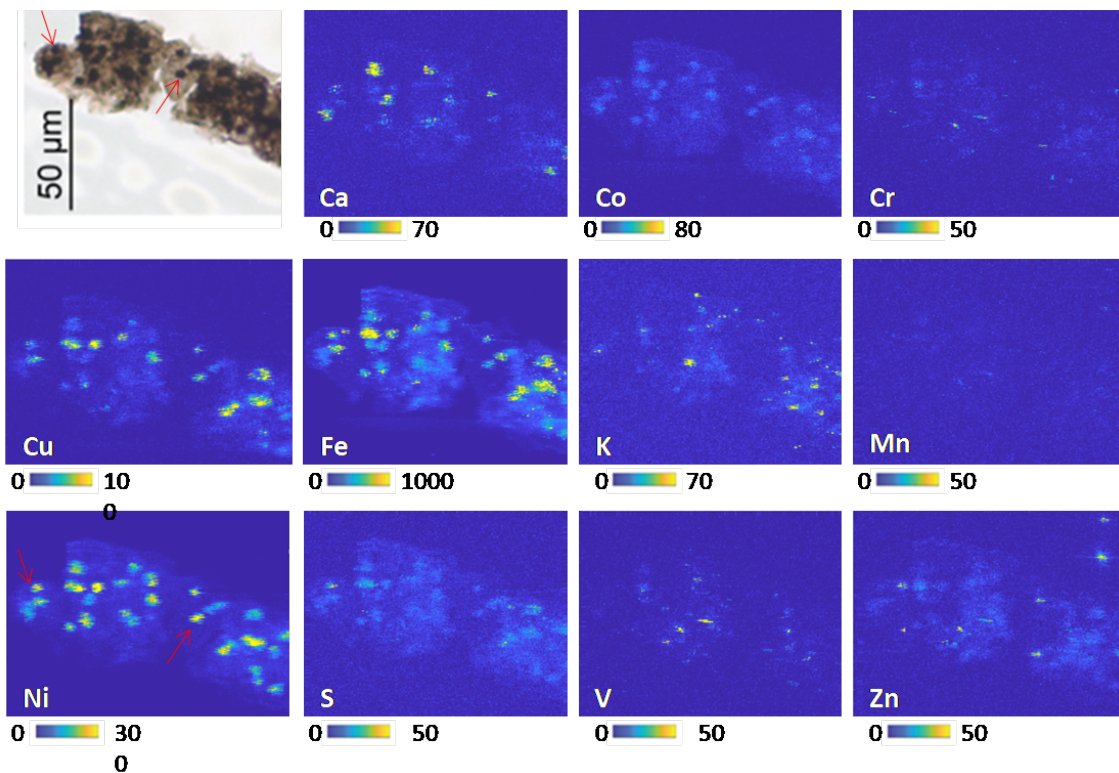

**Figure S7. Photomicrograph of *P. filiformis* and its SR-nanoXRF maps, related to Figure 2.** These SR-nanoXRF maps show the distribution of several elements and highlight that the distribution of Ni and Co is mainly within ICIs. They also show a distribution of Ca and Cu within ICIs for this specimen. These maps were obtained at Soleil synchrotron (energy 12 keV).

**Table S8. Counts of Ni in the sheath, cell wall and ICIs of *P. filiformis* and the ratios between ICI and the cell wall and between ICI and the sheath, showing the enrichment of Ni mainly in ICI, related to Figure 2.**

| <b>Ni counts in sheath (cts.s<sup>-1</sup>)</b> | <b>Ni counts in cell wall (cts.s<sup>-1</sup>)</b> | <b>Ni counts in ICI (cts.s<sup>-1</sup>)</b> | <b>ICI/cell wall</b> | <b>ICI/sheath</b> |
|-------------------------------------------------|----------------------------------------------------|----------------------------------------------|----------------------|-------------------|
| 0.00035                                         | 0.0006                                             | 0.0048                                       | 7.96                 | 11.11             |
| 0.00034                                         | 0.00069                                            | 0.0039                                       | 5.7                  | 14.29             |
| 0.000054                                        | 0.00011                                            | 0.0029                                       | 26.74                | 53.87             |
| 0.00012                                         | 0.00012                                            | 0.0018                                       | 18.29                | 16.45             |

**Table S9. Parameters and results for the estimation of tetrapyrrole molar concentration in *P. filiformis* ICIs, related to Figure 3.**

<sup>a</sup> $V_{\text{cell}}=(4 \cdot \pi \cdot R_m^3)/3$ ; <sup>b</sup> $A_p=\pi \cdot R_m^2$ ; <sup>c</sup> $m_{\text{Ni}}=(AD_{\text{Ni}}) \cdot \text{ICI} \cdot 0.1 \cdot A_p$ ; <sup>d</sup> $n_{\text{Ni}}=m_{\text{Ni}}/M_{\text{Ni}}$ ; <sup>e</sup> $C_{\text{tetrapyrrole}}=n_{\text{Ni}}/V_{\text{cell}}$ ; [8]

| Cells | Radius<br>$R_m$<br>(mm) | Volume<br>$V_{\text{cell}}^a$<br>(mm <sup>3</sup> ) | % ICI<br>in<br>cell<br>ICI | Projected<br>area of<br>the cell<br>$A_p^b$<br>(mm <sup>2</sup> ) | Mean<br>count<br>rate<br>(counts/s) | Measured<br>area<br>density of<br>Ni in the<br>ICI<br>$AD_{\text{Ni}}$<br>(g/mm <sup>2</sup> ) | Calculated<br>Ni mass<br>$m_{\text{Ni}}^c$<br>(g) | Corresponding<br>number of<br>mole for Ni<br>$n_{\text{Ni}}^d$<br>(mol) | Molar<br>concentration<br>of<br>tetrapyrrole<br>$C_{\text{tetrapyrrole}}^e$<br>(pM) |
|-------|-------------------------|-----------------------------------------------------|----------------------------|-------------------------------------------------------------------|-------------------------------------|------------------------------------------------------------------------------------------------|---------------------------------------------------|-------------------------------------------------------------------------|-------------------------------------------------------------------------------------|
| 1     | 0.00723                 | 1.58<br>.10 <sup>-6</sup>                           | 41.67                      | 0.00016                                                           | 10.49                               | 2.87 .10 <sup>-17</sup>                                                                        | 1.97 .10 <sup>-21</sup>                           | 3.35 .10 <sup>-23</sup>                                                 | 21.16                                                                               |
| 2     | 0.00784                 | 2.02<br>.10 <sup>-6</sup>                           | 37.56                      | 0.00019                                                           | 20.15                               | 5.51 .10 <sup>-17</sup>                                                                        | 4 .10 <sup>-21</sup>                              | 6.81 .10 <sup>-23</sup>                                                 | 33.79                                                                               |
| 3     | 0.00594                 | 8.79<br>.10 <sup>-7</sup>                           | 42.72                      | 0.00011                                                           | 14.64                               | 4 .10 <sup>-17</sup>                                                                           | 1.90 .10 <sup>-21</sup>                           | 3.23 .10 <sup>-23</sup>                                                 | 36.81                                                                               |
| 4     | 0.00855                 | 2.57<br>.10 <sup>-6</sup>                           | 44.21                      | 0.00023                                                           | 20.13                               | 5.51 .10 <sup>-17</sup>                                                                        | 5.53 .10 <sup>-21</sup>                           | 9.42 .10 <sup>-23</sup>                                                 | 36.61                                                                               |
| 5     | 0.00803                 | 2.17<br>.10 <sup>-6</sup>                           | 26.63                      | 0.00020                                                           | 17.12                               | 4.6 .10 <sup>-17</sup>                                                                         | 2.53 .10 <sup>-21</sup>                           | 4.31 .10 <sup>-23</sup>                                                 | 19.85                                                                               |
| 6     | 0.00758                 | 1.83<br>.10 <sup>-6</sup>                           | 26.03                      | 0.00018                                                           | 2.09                                | 5.72 .10 <sup>-18</sup>                                                                        | 2.69 .10 <sup>-22</sup>                           | 4.59 .10 <sup>-24</sup>                                                 | 2.51                                                                                |
| 7     | 0.00911                 | 3.17<br>.10 <sup>-6</sup>                           | 24.79                      | 0.00026                                                           | 3.95                                | 1.08 .10 <sup>-17</sup>                                                                        | 6.99 .10 <sup>-22</sup>                           | 1.19 .10 <sup>-23</sup>                                                 | 3.76                                                                                |



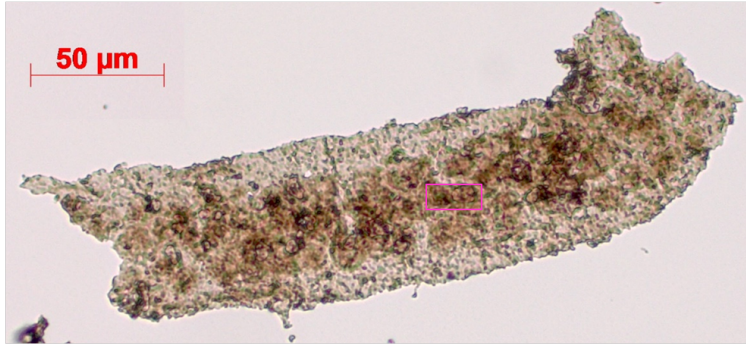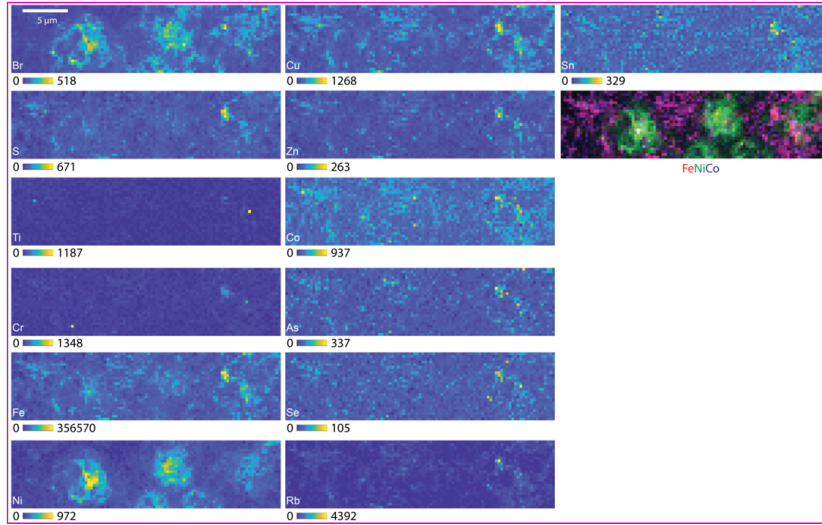

**Figure S10. Photomicrograph of *P. filiformis* and its SR-μXRF maps, related to Figure 2.** These SR-μXRF maps are focused on five ICIs and show the distribution of several elements and particularly highlight that the distribution of Ni is mainly within ICIs (pink area). These maps were obtained at SLS synchrotron (energy 8.4 keV).

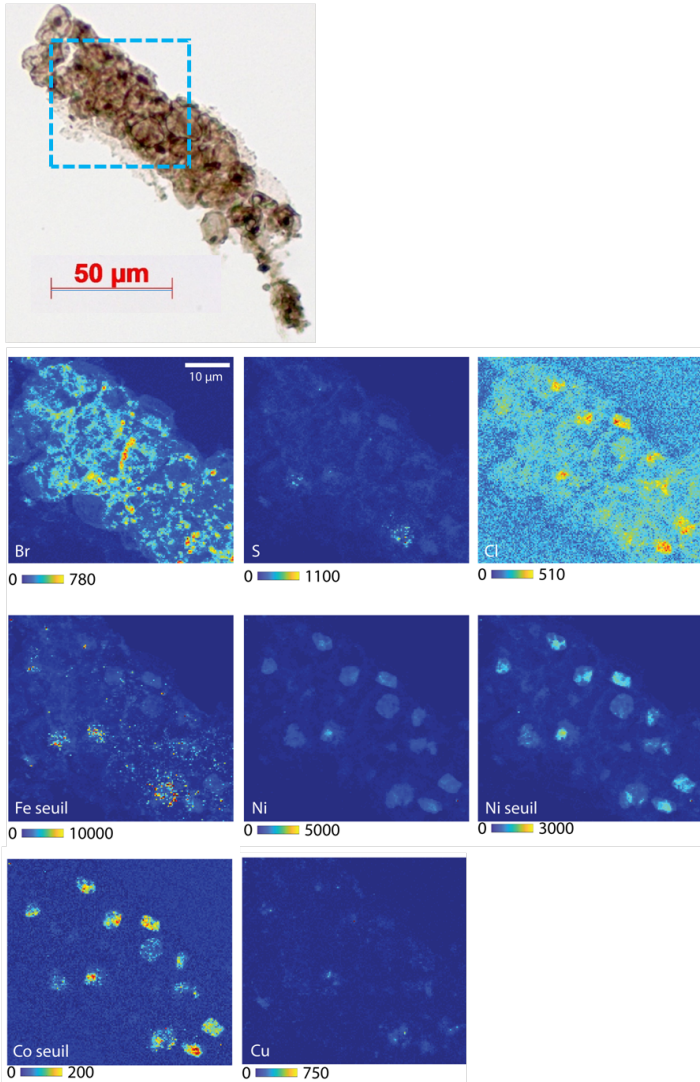

**Figure S11. Photomicrograph of *P. filiformis* and its SR-nanoXRF maps, related to Figure 2.** These SR-nanoXRF maps show the distribution of several elements and highlight that the distribution of Ni and Co is mainly within ICIs (blue area). These maps were obtained at ESRF synchrotron (energy 17.5 keV).



**Table S12. Linear combination fitting results for Ni K-edge spectra of XANES, related to Figure 3.**

| <b>Analysis point</b> | <b>NiOEP</b> | <b>NiTPP</b> | <b>Asphaltene</b> | <b>NiO</b> | <b>Ni3S2</b> | <b>Sum</b> | <b>R factor</b> | <b>Total porphyrinic species ratio</b> |
|-----------------------|--------------|--------------|-------------------|------------|--------------|------------|-----------------|----------------------------------------|
| Point 1               | 37.4 %       | 15.4 %       | 12.6 %            | 12.4 %     | 29.1 %       | 106.9 %    | 0.0022          | 65.4 %                                 |
| Point 2               | 41.4 %       | 0 %          | 11.3 %            | 10.9 %     | 46.3 %       | 109.8 %    | 0.0026          | 52.7 %                                 |
| Point 1 2019          | 46 %         | 15.8 %       | 28.8 %            | 5.1 %      | 0 %          | 95.7 %     | 0.0012          | 90.6 %                                 |
| Point 2 2019          | 34.8 %       | 22.4 %       | 25.5 %            | 14.4 %     | 0 %          | 97.1 %     | 0.0013          | 82.7 %                                 |
| Point 3 2019          | 44.8 %       | 16.3 %       | 14.5 %            | 17 %       | 0 %          | 92.6 %     | 0.0010          | 75.6 %                                 |

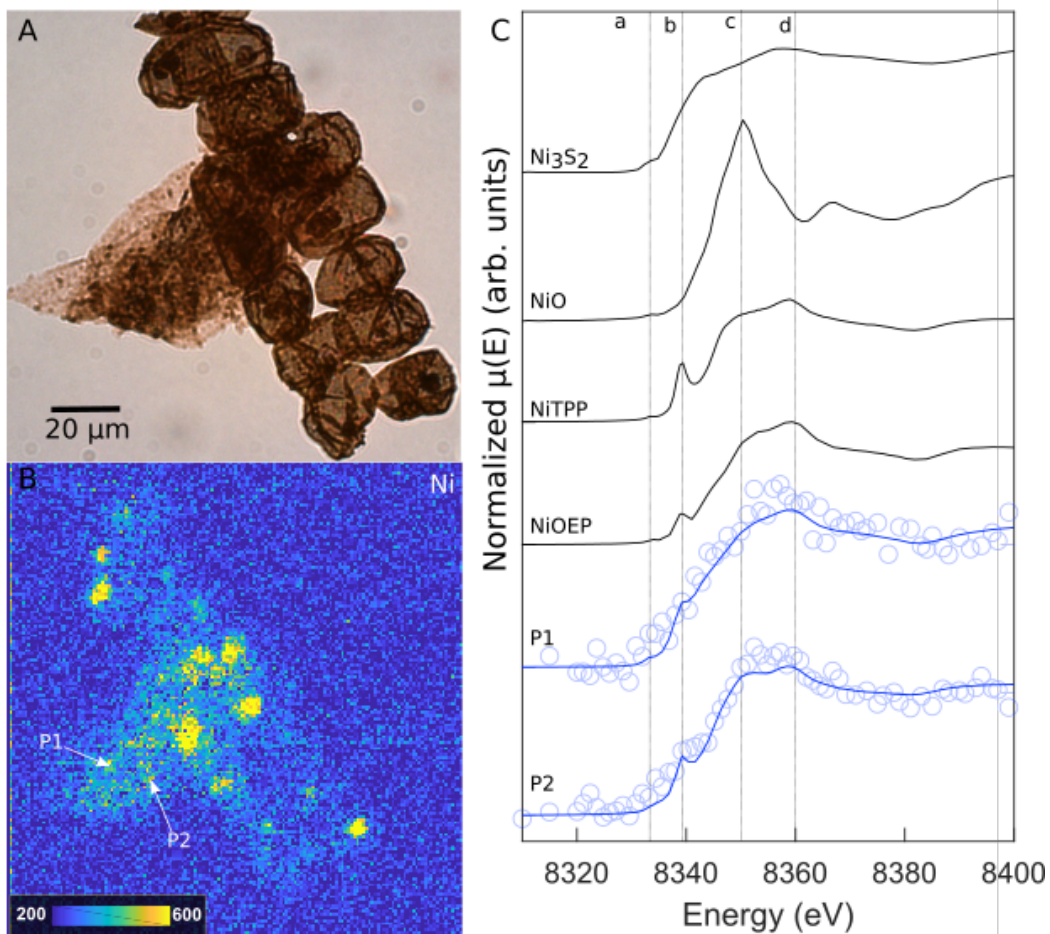

**Figure S13. Ni-geoporphyrin SR-nanoXRF and SR- $\mu$ XANES spectra measured in two ICIs of *P. filiformis*, related to Figure 3. (A) Microphotograph of *P. filiformis* (located below another microfossil), (B) SR-XRF map showing enrichment of Ni within ICIs. (C) SR- $\mu$ XANES spectra obtained at SLS synchrotron on a specimen of *P. filiformis* and on two Ni-enriched ICIs (point 1 & 2) at Ni K-edge. These spectra were compared to spectra of Ni inorganic (NiO and Ni<sub>3</sub>S<sub>2</sub>) and organic (NiOEP; NiTPP and Asphaltene) standards. The four lines (a, b, c and c – dotted lines) are typical of spectrum shape of Ni in coordination (IV) in Ni-porphyrins. Data (blue stars) obtained for ICIs of the microfossil and their fitted spectra may have differences due to the molecular heterogeneities between inorganic and organic standards used for the linear combination fitting and the incorporated tetrapyrroles moieties in kerogen.**

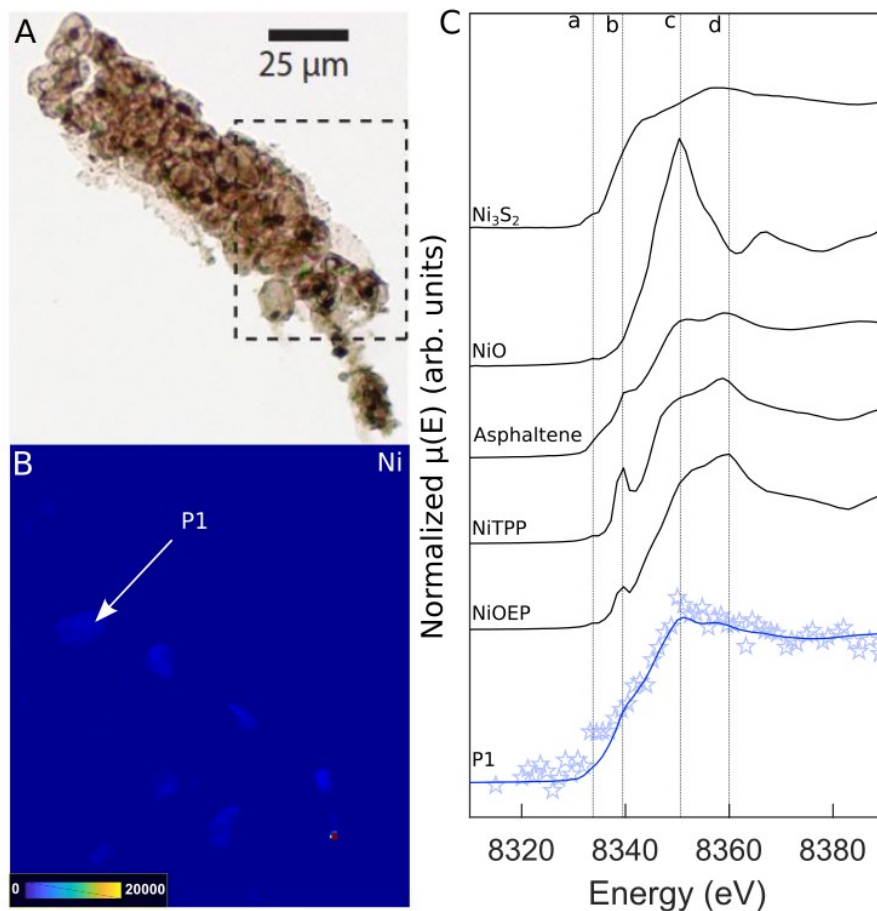

**Figure S14. Ni-geoporphyrin SR-nanoXRF and SR- $\mu$ XANES spectra measured in an ICI of *P. filiformis*, related to Figure 3. (A) Microphotograph of *P. filiformis*, (B) SR-XRF map showing enrichment of Ni within ICIs (black area). (C) SR- $\mu$ XANES spectra obtained at SLS synchrotron on a specimen of *P. filiformis* and on one Ni-enriched ICI (point 1) at Ni K-edge. This spectrum was compared to spectra of Ni inorganic (NiO and Ni<sub>3</sub>S<sub>2</sub>) and organic (NiOEP; NiTPP and Asphaltene) standards. The four lines (a, b, c and c – dotted lines) are typical of spectrum shape of Ni in coordination (IV) in Ni-porphyrins. Data (blue stars) obtained for ICIs of the microfossil and their fitted spectra may have differences due to the molecular heterogeneities between inorganic and organic standards used for the linear combination fitting and the incorporated tetrapyrroles moieties in kerogen.**

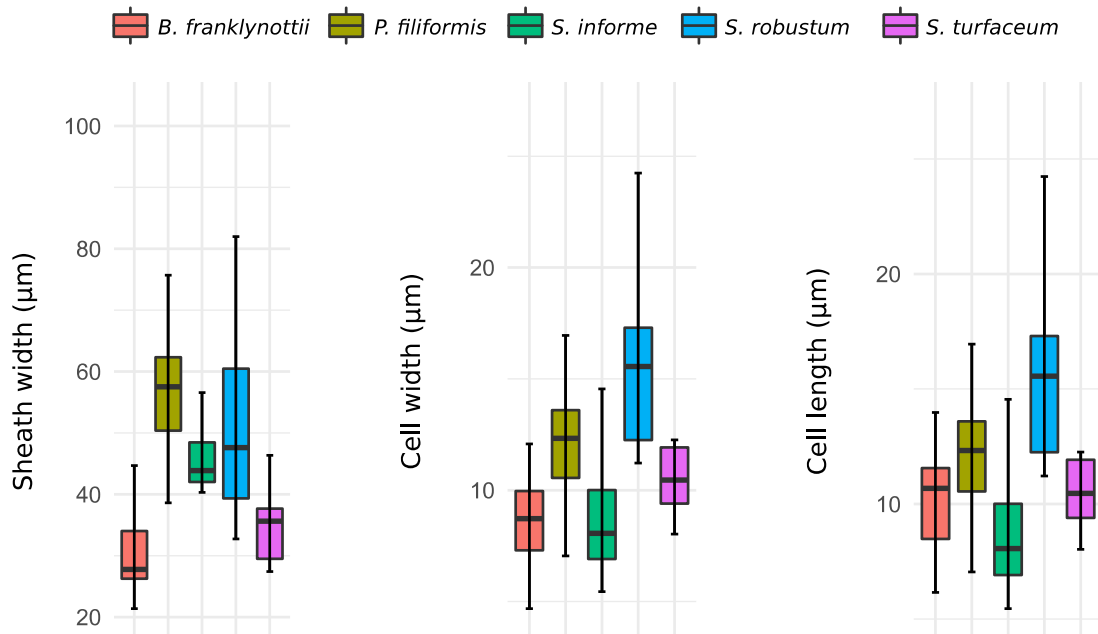

Figure S15. Boxplot of sheath width, cell width and cell length of fossil *P. filiformis* (n=30) and modern red alga *B. franklynottii* CCMP3416 (n=22) and cyanobacteria *S. informe* CBFS-A033 (n=12), *S. robustum* CBFS-A027 (n=12), *S. turfaceum* CBFS-A034 (n=19), related to Figure 1 and Table S4 for measurements.

**Table S16. Tentative of bands assignment for FT-IR spectra of *Polysphaeroides filiformis*, *Calothrix* sp. BCCM/ULC003, *Stigonema ocellatum* SAG48.90 and *Bangiopsis franklynottii* CCMP3416, related to Figure 5.**

| Bands (cm <sup>-1</sup> ) on micro-FTIR spectra of the studied specimens |                                     |                                 |                                     | Tentative bands assignment                                                                                                                                        |
|--------------------------------------------------------------------------|-------------------------------------|---------------------------------|-------------------------------------|-------------------------------------------------------------------------------------------------------------------------------------------------------------------|
| <i>P. filiformis</i>                                                     | <i>Calothrix</i> sp.<br>BCCM/ULC003 | <i>S. ocellatum</i><br>SAG48.90 | <i>B. franklynottii</i><br>CCMP3416 |                                                                                                                                                                   |
|                                                                          |                                     |                                 | 687s                                | -CH out of plane bend [9]                                                                                                                                         |
|                                                                          |                                     | 718w                            |                                     | -CH out of plane bend [9]                                                                                                                                         |
|                                                                          | 747mw                               | 742w                            |                                     | -CH out of plane bend [9]                                                                                                                                         |
| 750w                                                                     |                                     |                                 |                                     | =C-H aromatic deformation [10]                                                                                                                                    |
|                                                                          |                                     | 788w                            |                                     | -CH out of plane bend [9]                                                                                                                                         |
| 802m                                                                     |                                     |                                 |                                     | =C-H aromatic deformation [11]                                                                                                                                    |
|                                                                          | 826mw                               |                                 |                                     | -CH out of plane bend [9]                                                                                                                                         |
|                                                                          |                                     | 844w                            |                                     | -CH out of plane bend [9]                                                                                                                                         |
|                                                                          |                                     |                                 | 850m                                | α glycosidic linkage [12]                                                                                                                                         |
|                                                                          |                                     | 872w                            |                                     | -CH out of plane bend [9]                                                                                                                                         |
| 879w                                                                     |                                     |                                 |                                     | =C-H aromatic deformation [10]                                                                                                                                    |
|                                                                          |                                     | 890mw                           |                                     | β glycosidic linkage [12]                                                                                                                                         |
|                                                                          | 897w                                |                                 |                                     | Antisymmetrical out of phase stretching [13]                                                                                                                      |
|                                                                          |                                     |                                 | 928m                                | C-O vibrations of the 3,6anhydro-bridge (galactose) [12]                                                                                                          |
|                                                                          |                                     | 934m                            |                                     | C-O-C[9]                                                                                                                                                          |
|                                                                          | 965sh                               | 967mw                           |                                     | C-O, C-C [9]                                                                                                                                                      |
|                                                                          |                                     | 990mw                           |                                     | C-O-C stretching[15]                                                                                                                                              |
| 1002ms                                                                   |                                     |                                 | <b>1006vs</b>                       | C-O-C stretching etheric bonds in the glucopyranose ring [14]; deformation vibration C-O secondary alcohols [16]                                                  |
|                                                                          | <b>1032vs*</b>                      | 1044s                           |                                     | C-O-C stretching etheric bonds in the glucopyranose ring [14]                                                                                                     |
| <b>1079vs</b>                                                            | 1073s                               | <b>1074vs</b>                   | 1074sh                              | C-O-C stretching etheric bonds in the glucopyranose ring [14]; deformation vibration C-O secondary alcohols (16); 3,6-anhydrobridge if shoulder in red algae (17) |
|                                                                          |                                     | 1114ms                          |                                     | C-O-C stretching etheric bonds in the glucopyranose ring [14]                                                                                                     |
| 1136ms                                                                   | 1138ms                              |                                 |                                     | deformation vibration C-O secondary alcohols [16]                                                                                                                 |
|                                                                          | 1165ms                              | 1151ms                          | 1148m                               | C-O stretching [18]; skeletal vibration of the polygalactane [19]; CC ring stretching breathing pyrrole in scytonemin [22]                                        |
|                                                                          |                                     | 1179sh                          |                                     | C-O stretching [18]                                                                                                                                               |
| 1193sh                                                                   |                                     |                                 |                                     | deformation vibration in phenols, ether [16]                                                                                                                      |

|        |         |        |        |                                                                                                                                     |
|--------|---------|--------|--------|-------------------------------------------------------------------------------------------------------------------------------------|
| 1202sh | 1202sh  |        |        | C-O-C stretching of polysaccharides [15]; C-O stretching, Phenol [20, 21]                                                           |
|        |         |        | 1206m  | S=O stretching [18]                                                                                                                 |
|        |         | 1247mw |        | P=O stretching in nucleic acids [15]                                                                                                |
| 1261m  |         |        |        | deformation vibration C-O in aryl ethers [16]; (C=C-C=C) system stretching (trans) in scytonemin [22]                               |
|        | 1272m   |        |        | (CC) stretching of aromatic ring: <i>p</i> -disubstituted benzenes in scytonemin [22]                                               |
|        | 1319m*  | 1314w  |        | C-H stretch, N-H bend in proteins [18]; C=N stretch in indole ring of scytonemin [22]                                               |
|        |         |        | 1335w  | SO <sub>2</sub> out-of-phase stretching [23]                                                                                        |
|        | 1372m*  | 1375mw |        | -CH <sub>2</sub> , -CH <sub>3</sub> , C-O bending in proteins and carboxylic groups [18]; stretch of indole ring in scytonemin [24] |
|        |         |        | 1406s  | C-O carboxylic group stretching [18]                                                                                                |
|        |         | 1417mw |        | C-O carboxylic group stretching [18]                                                                                                |
| 1432ms |         |        |        | asymmetric stretching -CH <sub>3</sub> -CH <sub>2</sub> [16]; C=CH bending modes in scytonemin [22]                                 |
|        | 1449m*  |        |        | stretching C=CH in scytonemin [22]                                                                                                  |
|        | 1454m*  |        |        | (N=C-C=C) ring stretching in scytonemin [24]                                                                                        |
|        |         | 1462mw | 1463s  | C-O stretching of carboxylic group [18]; -CH <sub>3</sub> bending [12]                                                              |
| 1466sh |         |        |        | asymmetric stretching -CH <sub>3</sub> -CH <sub>2</sub> [16]                                                                        |
|        | 1514m*  |        |        | (N=C-C=C) ring stretching in scytonemin [22]                                                                                        |
| 1534m  |         |        |        | aliphatic COOH (as <i>sh</i> ) in [10]                                                                                              |
|        | 1544ms  | 1545m  | 1541s  | N-H bend of amide II [15]                                                                                                           |
|        | 1587ms* |        |        | Aromatic groups C=C [11]; C-CH aromatic ring quadrant stretching in scytonemin [22]                                                 |
| 1594m  |         |        |        | C-C aromatic ring stretching [10]                                                                                                   |
| 1625sh |         |        |        | aromatic C=C [16]; C=CH stretching attached to cyclopentene ring in scytonemin [22]                                                 |
|        | 1637ms  | 1634s  | 1633s  | C=O stretching amide I [12, 15]; C=CH stretching attached to cyclopentene ring in scytonemin[22]                                    |
|        | 1653ms  | 1655s  |        | C=O stretching amide I [25]; C=C stretching conjugated (trans) in scytonemin [22]                                                   |
| 1671w  |         |        |        | Conjugated C=O [16]                                                                                                                 |
|        |         |        | 1681s  | C=O stretching ester groups [18]                                                                                                    |
|        | 1707mw  |        |        | C=O stretching ester groups [25]                                                                                                    |
| 1730w  |         | 1730ms |        | saturated aliphatic (-COO-R) [26]; C=O stretching [14, 21]                                                                          |
|        |         |        | 1743ms | C=O stretching ester groups [25]                                                                                                    |
| 2850   | 2856    | 2859   | 2859   | symmetric C-H of CH <sub>2</sub> stretching [10, 15]                                                                                |

|           |           |           |           |                                                       |
|-----------|-----------|-----------|-----------|-------------------------------------------------------|
|           | 2883      | 2883      | 2887      | stretching C-H of CH <sub>3</sub> [15]                |
| 2918      | 2929      | 2929      | 2929      | asymmetric stretching C-H of CH <sub>2</sub> [10, 15] |
| 2965      | 2969      | 2965      | 2960      | asymmetric stretching C-H of CH <sub>3</sub> [15]     |
| 3000-3100 |           |           | 3015      | OH-N stretching [16]                                  |
| 3100-3370 | 3000-3660 | 3000-3680 | 3000-3700 | -OH stretching [12]                                   |
| 3370-3500 |           |           |           | OH stretching [10]                                    |

\*denotes bands that also correspond to scytonemin vibrations; vs is for very strong, s is for strong, m for medium, w is for weak, sh stands for shoulder. Wavenumbers in bold represent the most intense bands of the spectra.

**Table S17. Summary data table for the studied fossil and modern organisms, related to Figures 1, 4 and 5.**

| <b>Organism</b>                             | <b>Morphology</b>                                                                                        | <b>Size</b>                                                                                                                | <b>Ultrastructure</b>                                                                                                                                                                                                                                                         | <b>Composition</b>                                                                                                                                                           |
|---------------------------------------------|----------------------------------------------------------------------------------------------------------|----------------------------------------------------------------------------------------------------------------------------|-------------------------------------------------------------------------------------------------------------------------------------------------------------------------------------------------------------------------------------------------------------------------------|------------------------------------------------------------------------------------------------------------------------------------------------------------------------------|
| <b><i>Polysphaeroides filiformis</i></b>    | Spheroidal vesicles arranged into filament. Branching filament surrounded by a sheath. T-type branching. | <i>Cells</i><br>5.51 – 28.77 µm;<br><i>Trichome width</i><br>14.24 – 51.06 µm;<br><i>Sheath width</i><br>38.61 – 75.7 µm   | Trilayered sheath with outer and inner electron-dense layers and a middle electron-tenuous layer. Bilayered cell wall with an outer electron-dense layer and an inner electron-tenuous layer.                                                                                 | Mainly composed of polysaccharides comparable to polysaccharides of cyanobacterial sheath.<br>Detection of Ni-porphyrins in ICI interpreted as degraded chlorophyll pigment. |
| <b><i>Stigonema informe</i> CBFS-A033</b>   | Spheroidal vesicles arranged into filament. Branching filament surrounded by a sheath. T-type branching. | <i>Cells</i><br>5.45 – 14.55 µm;<br><i>Trichome width</i><br>14.94 – 52.14 µm;<br><i>Sheath width</i><br>2547 – 62.92 µm   | /                                                                                                                                                                                                                                                                             | /                                                                                                                                                                            |
| <b><i>Stigonema robustum</i> CBFS-A027</b>  | Spheroidal vesicles arranged into filament. Branching filament surrounded by a sheath. T-type branching. | <i>Cells</i><br>8.62 – 25.82 µm;<br><i>Trichome width</i><br>31.88 – 46.09 µm;<br><i>Sheath width</i><br>32.75 – 108.75 µm | Trilayered sheath with outer and inner electron-dense layers and a middle electron-tenuous layer. Bilayered cell wall with an outer electron-dense layer and an inner electron-tenuous layer. Cells are embedded in a gel-like matrix and may present an individual envelope. | /                                                                                                                                                                            |
| <b><i>Stigonema turfaceum</i> CBFS-A034</b> | Spheroidal vesicles arranged into filament. Branching filament surrounded by a sheath. T-type branching. | <i>Cells</i><br>8.06 – 18.87 µm;<br><i>Trichome width</i><br>12.26 – 22.77 µm;<br><i>Sheath width</i><br>21.46 – 46.36 µm  | /                                                                                                                                                                                                                                                                             | /                                                                                                                                                                            |



|                                                                   |                                                                                                                                       |                                                                                                                                                    |                                                                                                                                                                |                                                                                                                                                                                                     |
|-------------------------------------------------------------------|---------------------------------------------------------------------------------------------------------------------------------------|----------------------------------------------------------------------------------------------------------------------------------------------------|----------------------------------------------------------------------------------------------------------------------------------------------------------------|-----------------------------------------------------------------------------------------------------------------------------------------------------------------------------------------------------|
| <p><b><i>Stigonema ocellatum</i></b><br/><b>SAG48.90</b></p>      | <p>Spheroidal vesicles arranged into filament. Branching filament surrounded by a sheath. T-type branching.</p>                       | <p><i>Cells</i><br/>8.66 – 19.36 µm;<br/><i>Trichome width</i><br/>15.54 – 19.36 µm;<br/><i>Sheath width</i><br/>22.61 – 29.28 µm</p>              | <p>/</p>                                                                                                                                                       | <p>Composed of polysaccharides mainly composing the sheath around filament. Detection of amide groups (nucleic acid and proteins).</p>                                                              |
| <p><b><i>Bangiopsis franklynottii</i></b><br/><b>CCMP3416</b></p> | <p>Discoidal cells individually surrounded by a sheath and grouped together into a filament by common mucilage. T-type branching.</p> | <p><i>Cells</i><br/>4.68 x 6.16 – 12.08 x 13.98 µm;<br/><i>Trichome width</i><br/>9.5 – 35.46 µm ;<br/><i>Mucilage width</i><br/>10 – 44.69 µm</p> | <p>Trilayered mucilage with the outer and inner electron-dense layers and a middle electron-tenuous layer. Thick laminated cell wall embedded in mucilage.</p> | <p>Detection of polysaccharides composing the mucilage surrounding the cells. Detection of C-O-C vibrations of the 3,6anhydrobridge (galactose) found in carrageenan (sulfated polysaccharide).</p> |

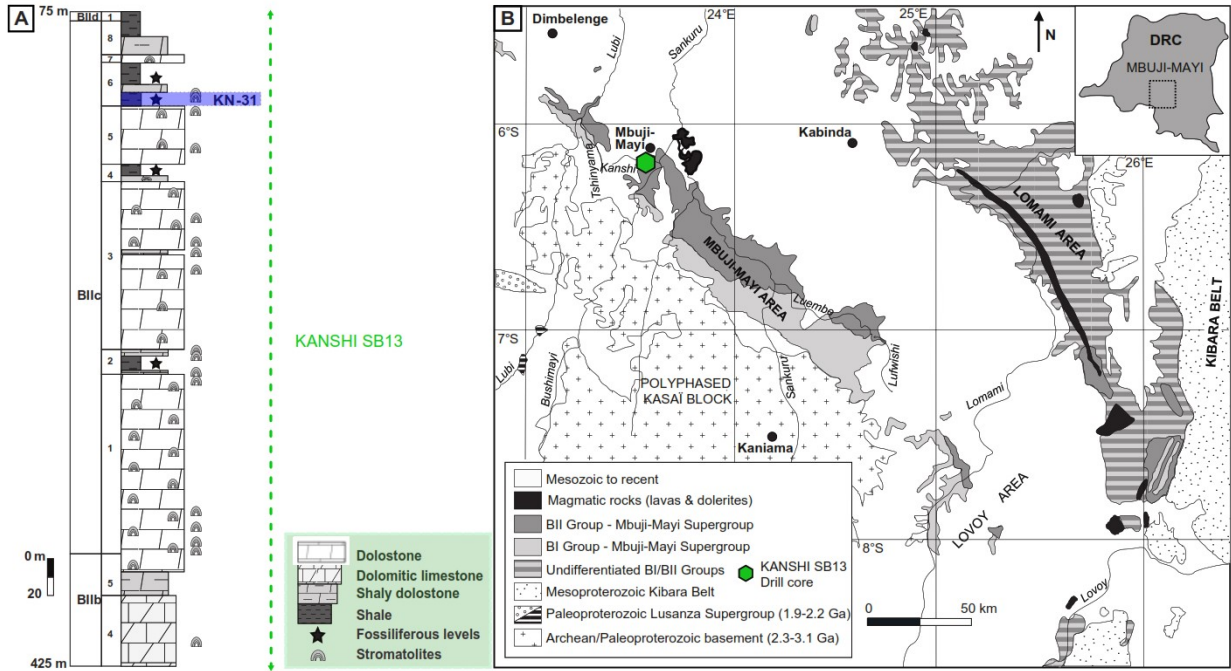

**Figure S18. Geological context of studied samples, related to the STAR methods. (A)** Stratigraphy of the drill core KANSHI SB13 and the location (KN-31) of the samples of *P. filiformis*. **(B)** Geological maps of the Sankuru-Mbuji-Mayi-Lomami-Lovoy basin and the location of the KANSHI SB13 drill core. Modified from Sforna et al. (2022) [8].

## Supplementary references

1. Petrov, P. Y., Sharma, M., Vorob'eva, N. G., and Sergeev, V. N. (2019). Facies-stratigraphic distribution of organic-walled and silicified microfossils in the early Billiyakh Basin (Lower Riphean, Anabar Uplift, Siberia). *Paleontol. J.*, *53*(8), 867-872.
2. Vorob'eva, N. G., Sergeev, V. N., and Petrov, P. Y. (2015). Kotuikan Formation assemblage: a diverse organic-walled microbiota in the Mesoproterozoic Anabar succession, northern Siberia. *Precambrian Res.*, *256*, 201-222.
3. François, C., Baludikay, B. K., Debaille, V., Birck, J. L., Limmois, D., Jourdan, F., Baudet, D., Paquette, J. L., Delvaux, D., and Javaux, E. J. (2023). Multi-method dating constrains the diversification of early eukaryotes in the Proterozoic Mbuji-Mayi Supergroup of the DR Congo and the geological evolution of the Congo Basin. *Journal of African Earth Sciences*, *198*, 104785.
4. Timofeev, B. V., Hermann, T. N., and Michailova, N. S. (1976). Mikrofotofossiliidokembria, kembriaiordovika (Microphytofossils of the Precambrian, Cambrian and Ordovician). *Nauka, Leningrad*, Scientific Institute of Precambrian Geology and Geochronology, 106 p [in Russian].
5. Han, C. M., Chen, L., Li, G. J., Pang, K., Wang, W., Zhou, G. Z., Yang, L., Lyu, W. G., Wang, K., Zhong, Z. H., Wu, C. X., and Yang, F. J. (2021). First record of organic-walled microfossils from the Tonian Shiwangzhuang Formation of the Tumen Group in western Shandong, North China. *Palaeoworld*, *30*(2), 208-219.
6. Vorob'eva, N. G., Sergeev, V. N., and Knoll, A. H. (2009). Neoproterozoic microfossils from the northeastern margin of the East European Platform. *J. Paleontol.*, *83*(2), 161-196.
7. Baludikay, B. K., François, C., Sforina, M. C., Beghin, J., Cornet, Y., Storme, J. Y., Fagel, N., Fontaine, F., Littke, R., Baudet, D., Delvaux, D., and Javaux, E. J. (2018). Raman microspectroscopy, bitumen reflectance and illite crystallinity scale: comparison of different geothermometry methods on fossiliferous Proterozoic sedimentary basins (DR Congo, Mauritania and Australia). *Int. J. Coal Geol.*, *191*, 80-94.
8. Sforina, M. C., Loron, C. C., Demoulin, C. F., François, C., Cornet, Y., Lara, Y. J., Grolmund, D., Sanchez, D. F., Medjoubi, K., Somogyi, A., Addad, A., Fadel, A., Compère, P., Baudet, D., Brocks, J. J., and Javaux, E. J. (2022). Intracellular bound chlorophyll residues identify 1 Gyr-old fossils as eukaryotic algae. *Nat. comm.*, *13*(1), 1-8.
9. Movasaghi, Z., Rehman, S., and urRehman, D. I. (2008). Fourier transform infrared (FTIR) spectroscopy of biological tissues. *Appl. Spectrosc. Rev.*, *43*(2), 134-179.
10. Alstadt, K. N., Katti, D. R., and Katti, K. S. (2012). An *in situ* FTIR step-scan photoacoustic investigation of kerogen and minerals in oil shale. *Spectrochim. Acta A Mol. Biomol. Spectrosc. SPECTROCHIM ACTA* *89*, 105-113.
11. Marshall, C. P., Javaux, E. J., Knoll, A. H., and Walter, M. R. (2005). Combined micro-Fourier transform infrared (FTIR) spectroscopy and micro-Raman spectroscopy of Proterozoic acritarchs: a new approach to palaeobiology. *Precambrian Res.*, *138*(3-4), 208-224.
12. Borjas Esqueda, A., Gardarin, C., and Laroche, C. (2002). Exploring the diversity of red microalgae for exopolysaccharide production. *Marine drugs*, *20*(4), 246.
13. Liang, C. Y., and Marchessault, R. H. (1959). Infrared spectra of crystalline polysaccharides. I. Hydrogen bonds in native celluloses. *J. Polym. Sci.*, *37*(132), 385-395.
14. Kaplan Can, H., Gurbuz, F., and Odabaşı, M. (2019). Partial characterization of cyanobacterial extracellular polymeric substances for aquatic ecosystems. *Aquat. Ecol.*, *53*(3), 431-440.
15. Kansiz, M., Heraud, P., Wood, B., Burden, F., Beardall, J., and McNaughton, D. (1999). Fourier transform infrared microspectroscopy and chemometrics as a tool for the discrimination of cyanobacterial strains. *Phytochemistry*, *52*(3), 407-417.

16. Wang, Q., Ye, J. B., Yang, H. Y., and Liu, Q. (2016). Chemical composition and structural characteristics of oil shales and their kerogens using Fourier Transform Infrared (FTIR) spectroscopy and solid-state <sup>13</sup>C Nuclear Magnetic Resonance (NMR). *Energy & Fuels*, *30*(8), 6271-6280.
17. Gómez-Ordóñez, E., and Rupérez, P. (2011). FTIR-ATR spectroscopy as a tool for polysaccharide identification in edible brown and red seaweeds. *Food hydrocoll.*, *25*(6), 1514-1520.
18. Murdock, J. N., and Wetzel, D. L. (2009). FT-IR microspectroscopy enhances biological and ecological analysis of algae. *Applied Spectroscopy Reviews*, *44*(4), 335-361.
19. Sekkal, M., Huvenne, J. P., Legrand, P., Sombret, B., Mollet, J. C., Mouradi-Givernaud, A., and Verdus, M. C. (1993). Direct structural identification of polysaccharides from red algae by FTIR microspectroscopy I: Localization of agar in *Gracilaria verrucosa*, sections. *Mikrochim. Acta*, *112*, 1-10.
20. Lin, R., and Ritz, G. P. (1993). Studying individual macerals using IR. microspectroscopy, and implications on oil versus gas/condensate proneness and "low-rank" generation. *Org. Geochem.*, *20*(6), 695-706.
21. Coates, J. (2000). "Interpretation of infrared spectra, a practical approach" in *Encyclopedia of analytical chemistry*, John Wiley & Sons Ltd, 2000, R. A., Meyers, Ed. pp. 10815-10837.
22. Varnali, T., Edwards, H. G. M., and Hargreaves, M. D. (2009). Scytonemin: molecular structural studies of a key extremophilic biomarker for astrobiology. *Int. J. Astrobiol.*, *8*(2), 133-140.
23. Larkin, P. (2011). *Infrared and Raman spectroscopy principles and spectral interpretation*. Elsevier pp. 230.
24. Grant, C. S., and Louda, J. W. (2013). Scytonemin-imine, a mahogany-colored UV/Vis sunscreen of cyanobacteria exposed to intense solar radiation. *Organic geochem.*, *65*, 29-36.
25. Benning, L. G., Phoenix, V. R., Yee, N., and Tobin, M. J. (2004). Molecular characterization of cyanobacterial silicification using synchrotron infrared microspectroscopy. *Geochim. Cosmochim. Acta*, *68*(4), 729-741.
26. Ahmad, S., Kothari, R., Pathak, V. V., and Pandey, M. K. (2019). Fuel quality index: a novel experimental evaluation tool for biodiesel prepared from waste cooking oil. *Waste and Biomass Valorization*, *10*(8), 2237-2247.
